# Supplementary material
Source: MDPI journal article supplement (https://www.mdpi.com/2072-4292/11/15/1756)

Figure S1. Chlorophyll-*a* time-series (year 2017)

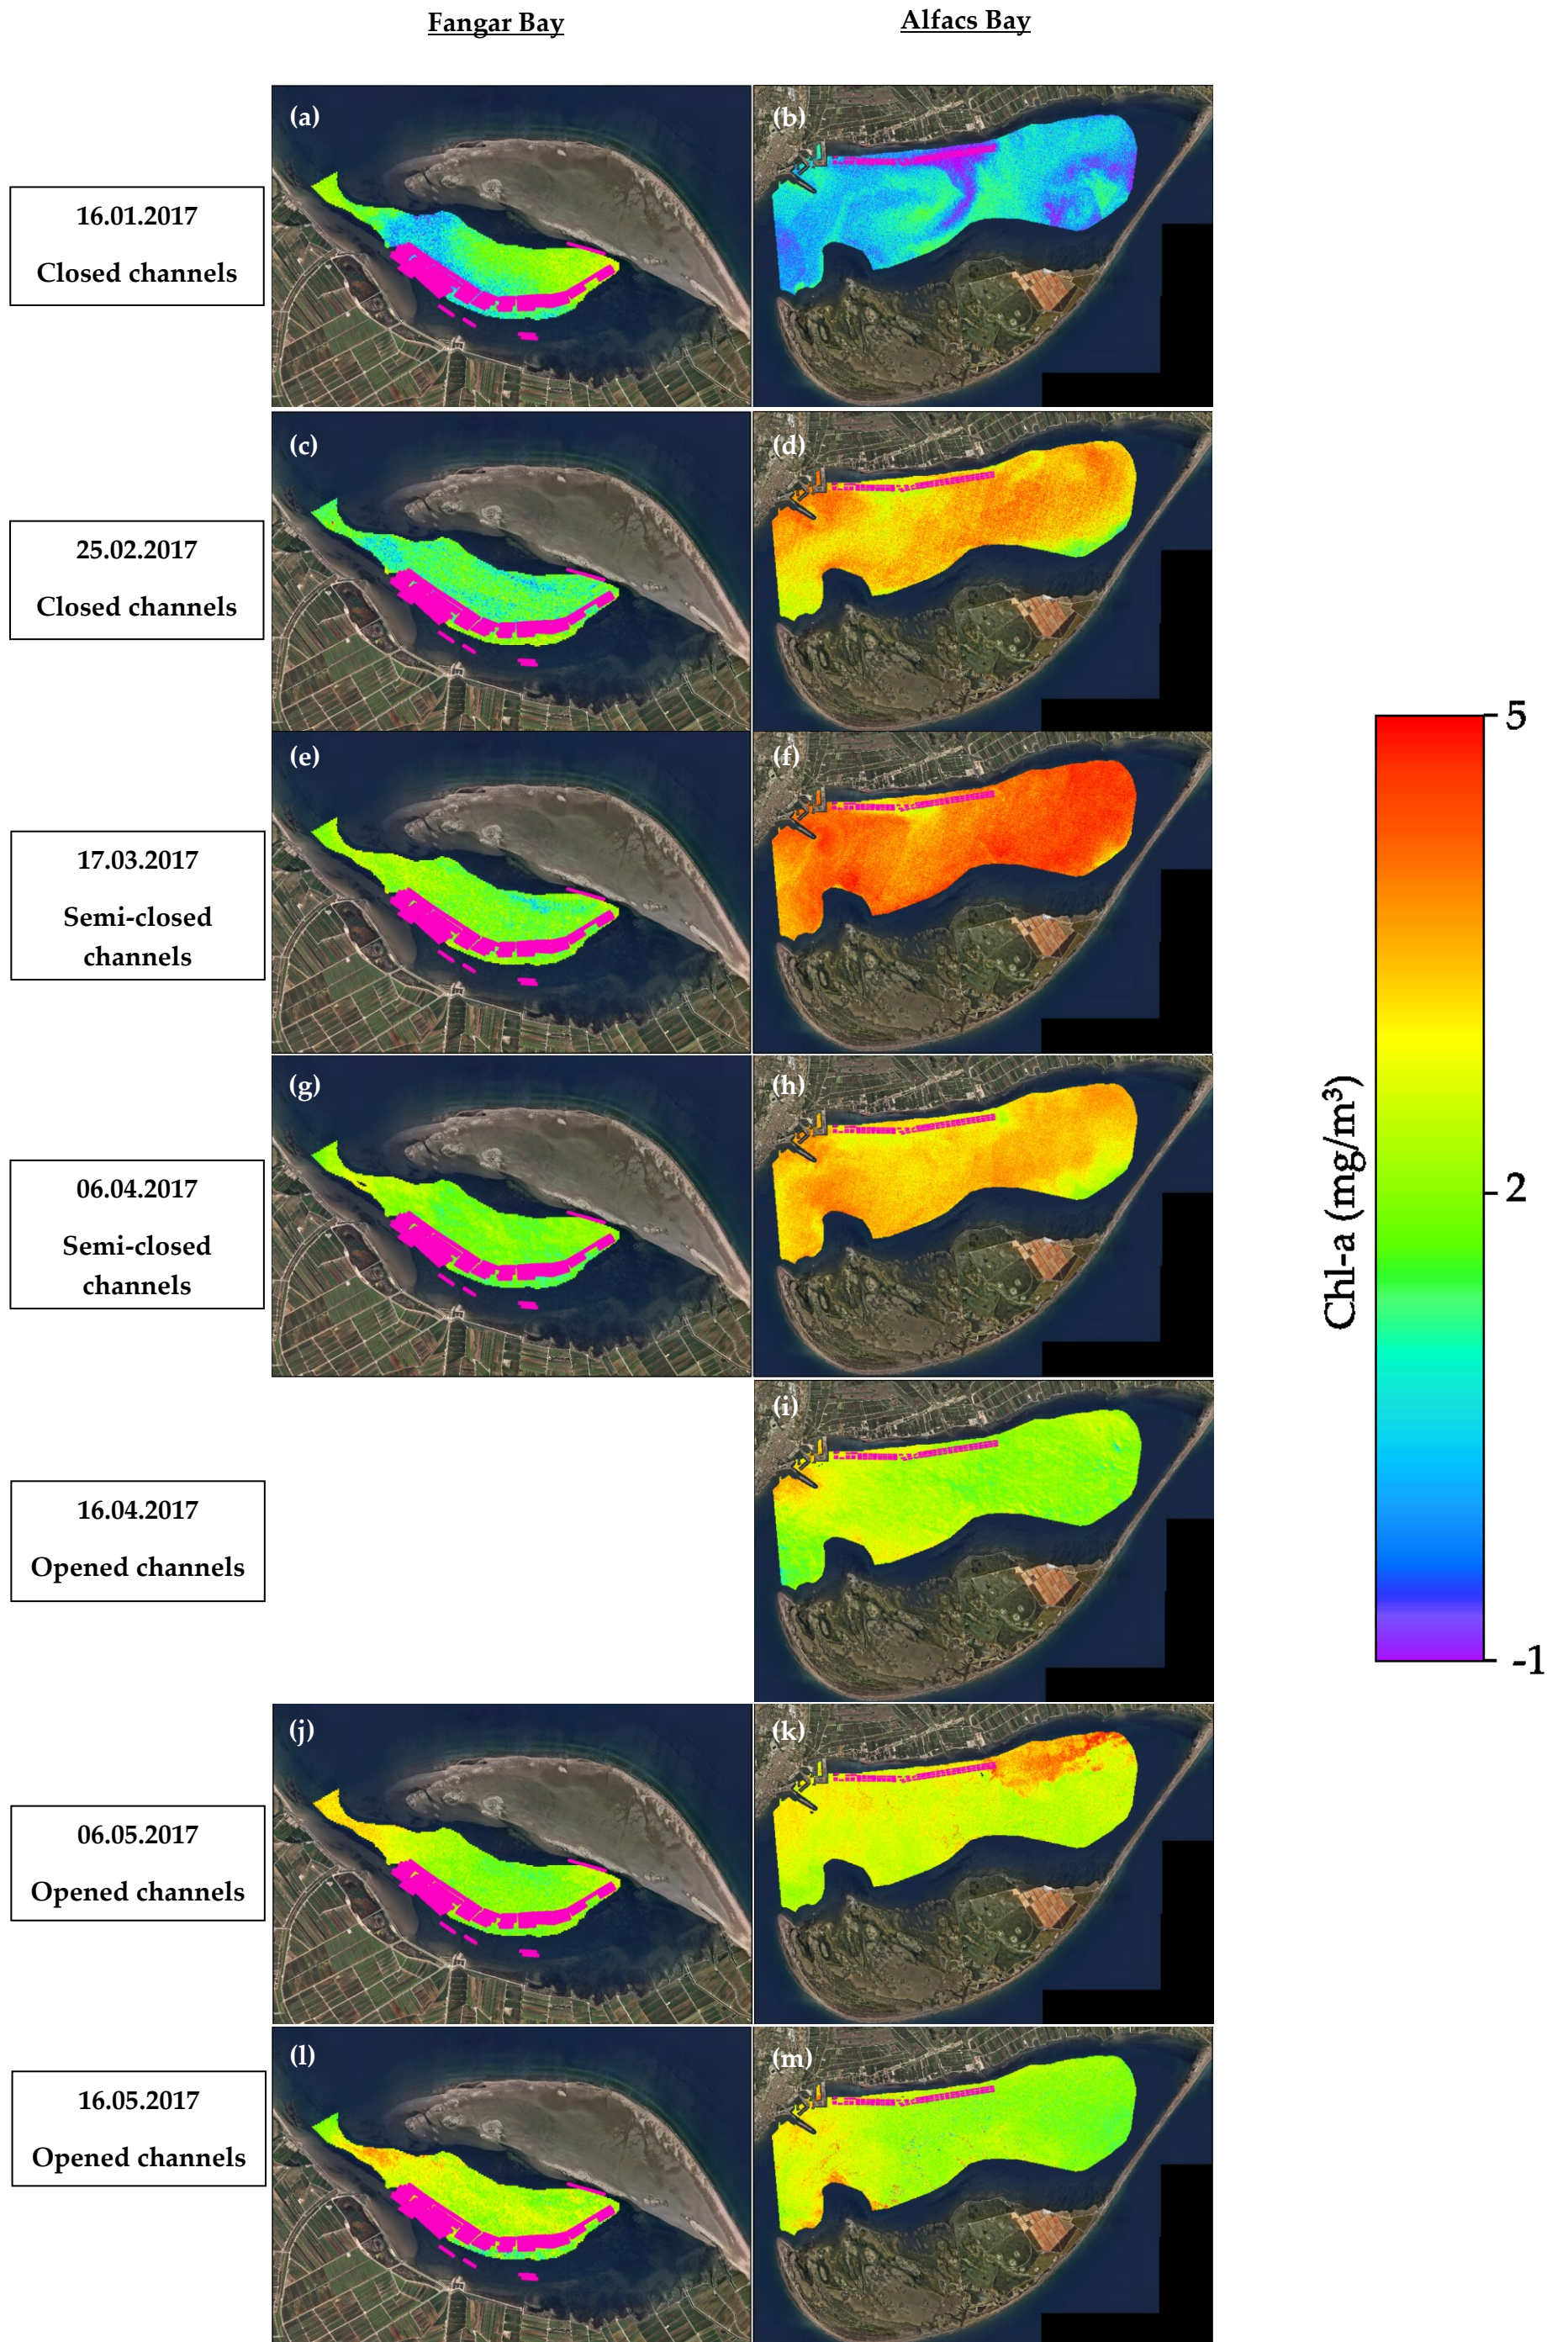



Figure S1. Chlorophyll-a time-series (year 2017)

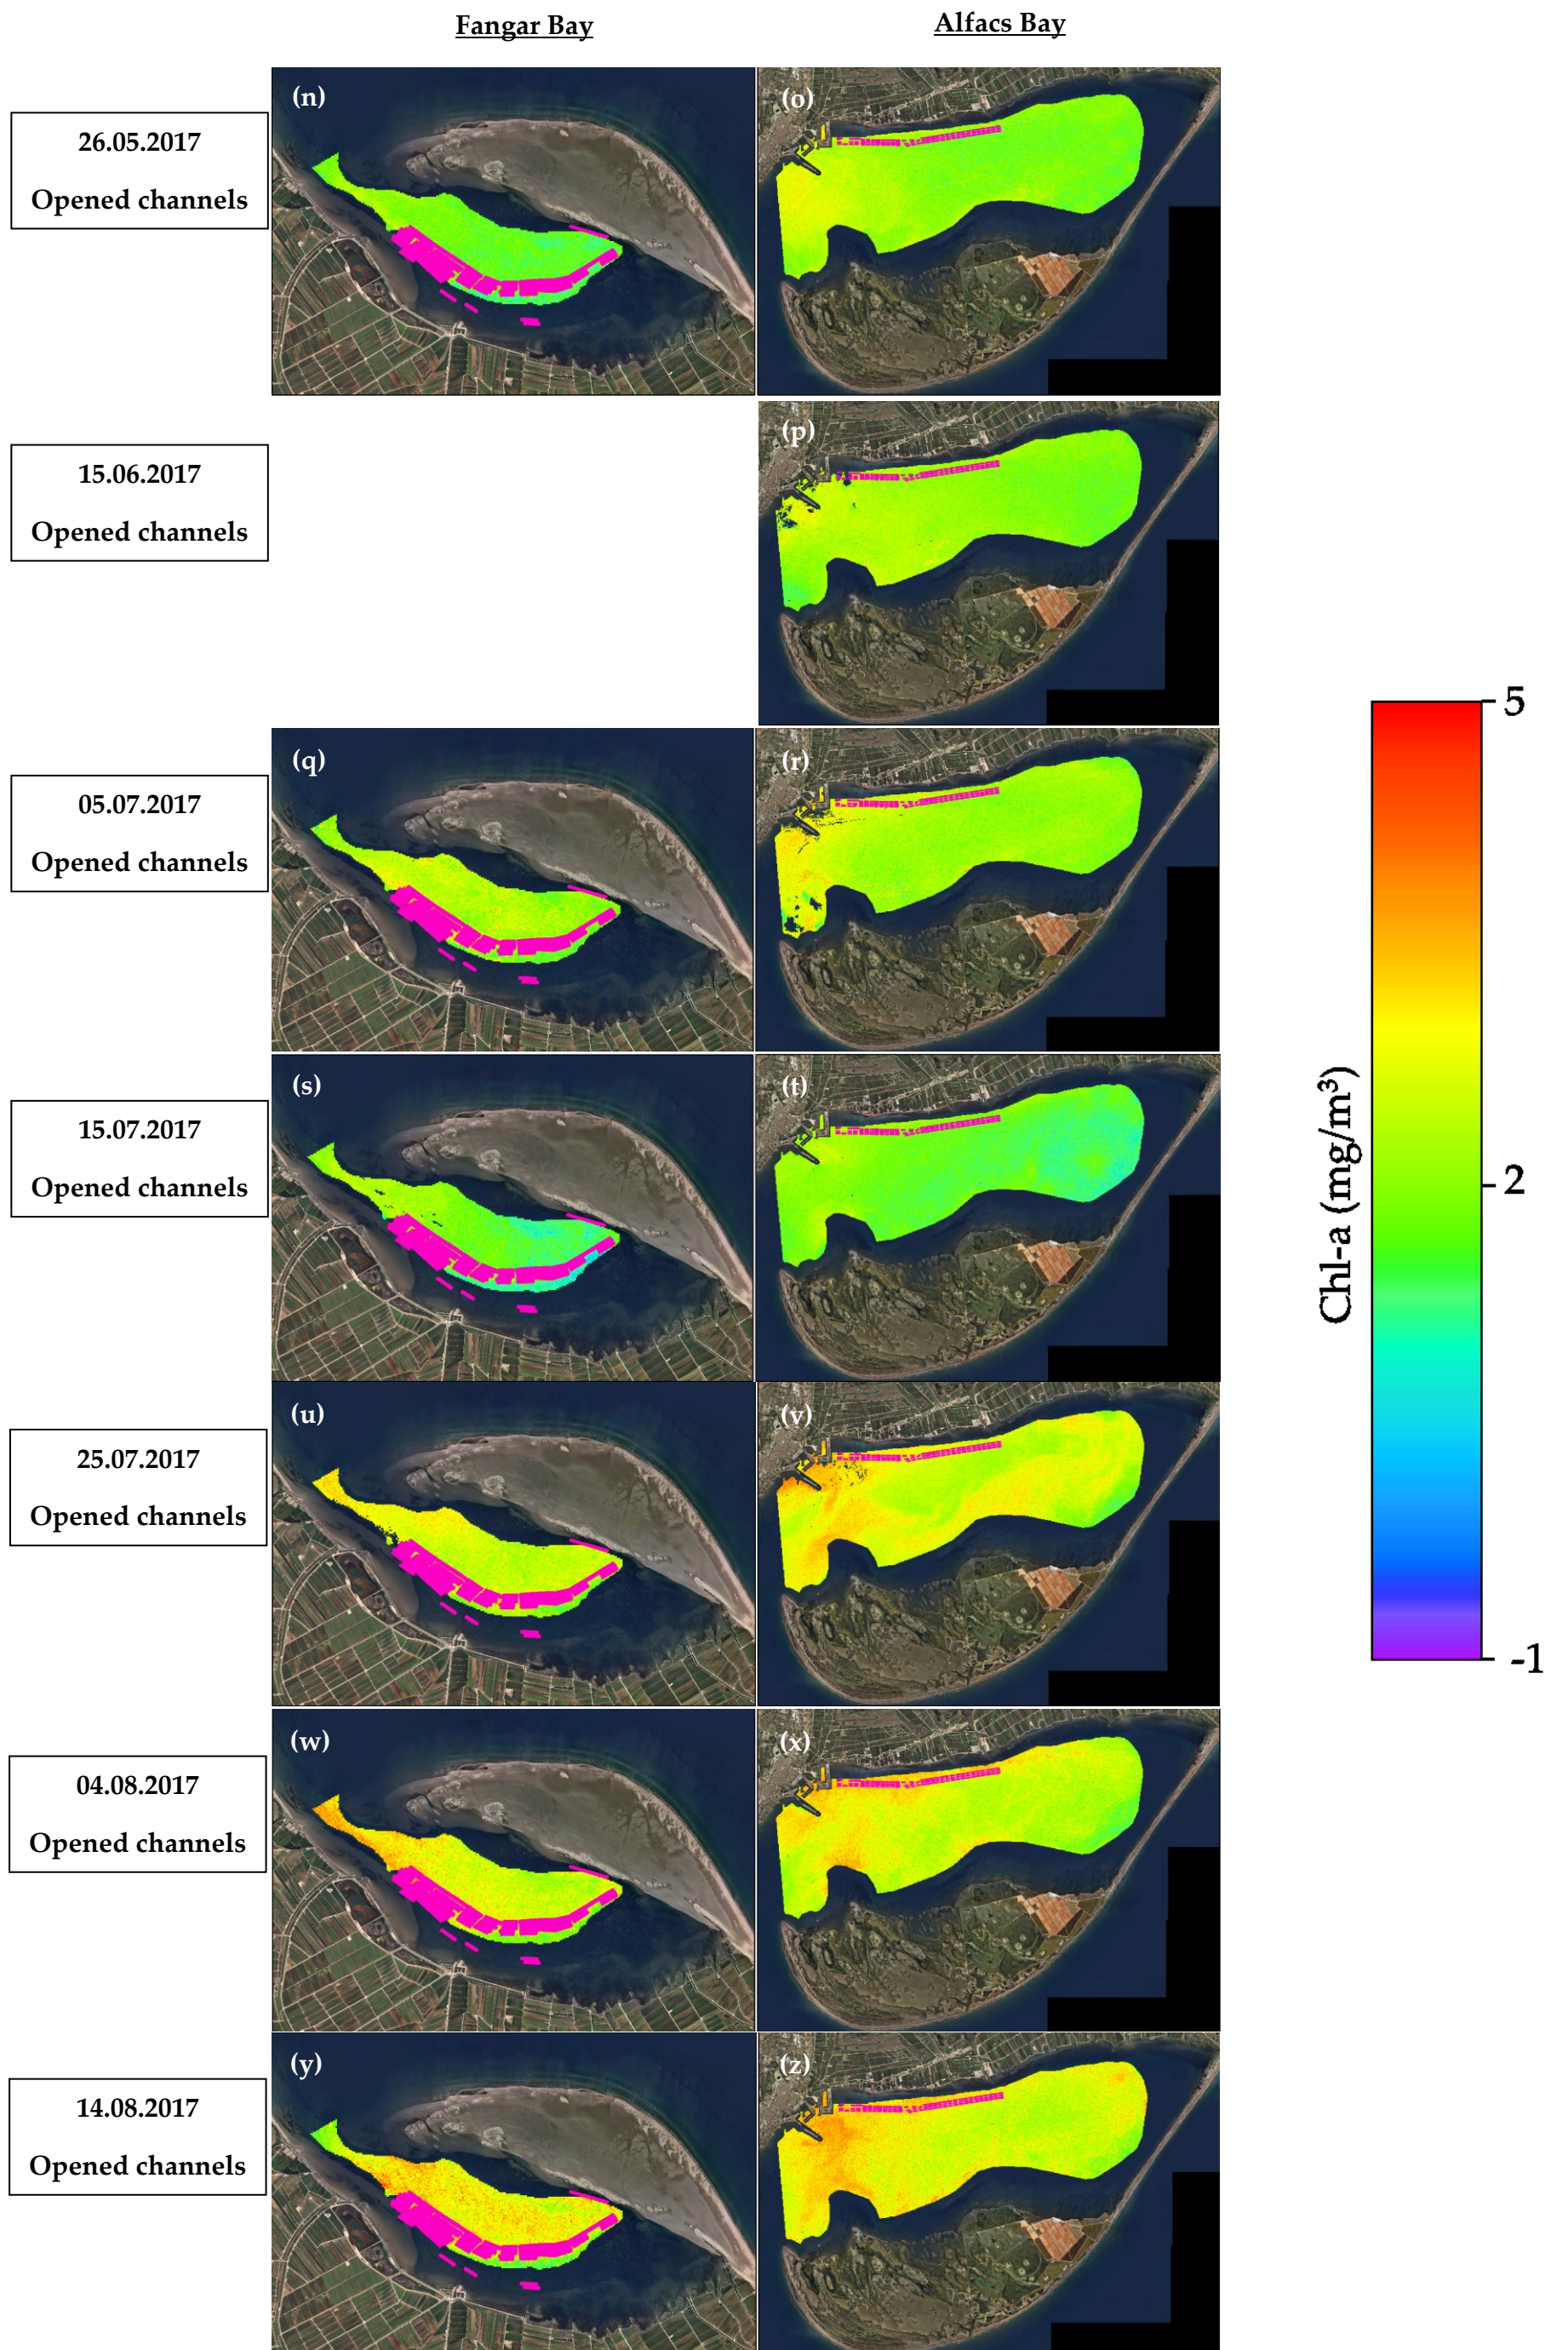



Figure S1. Chlorophyll-a time-series (year 2017)

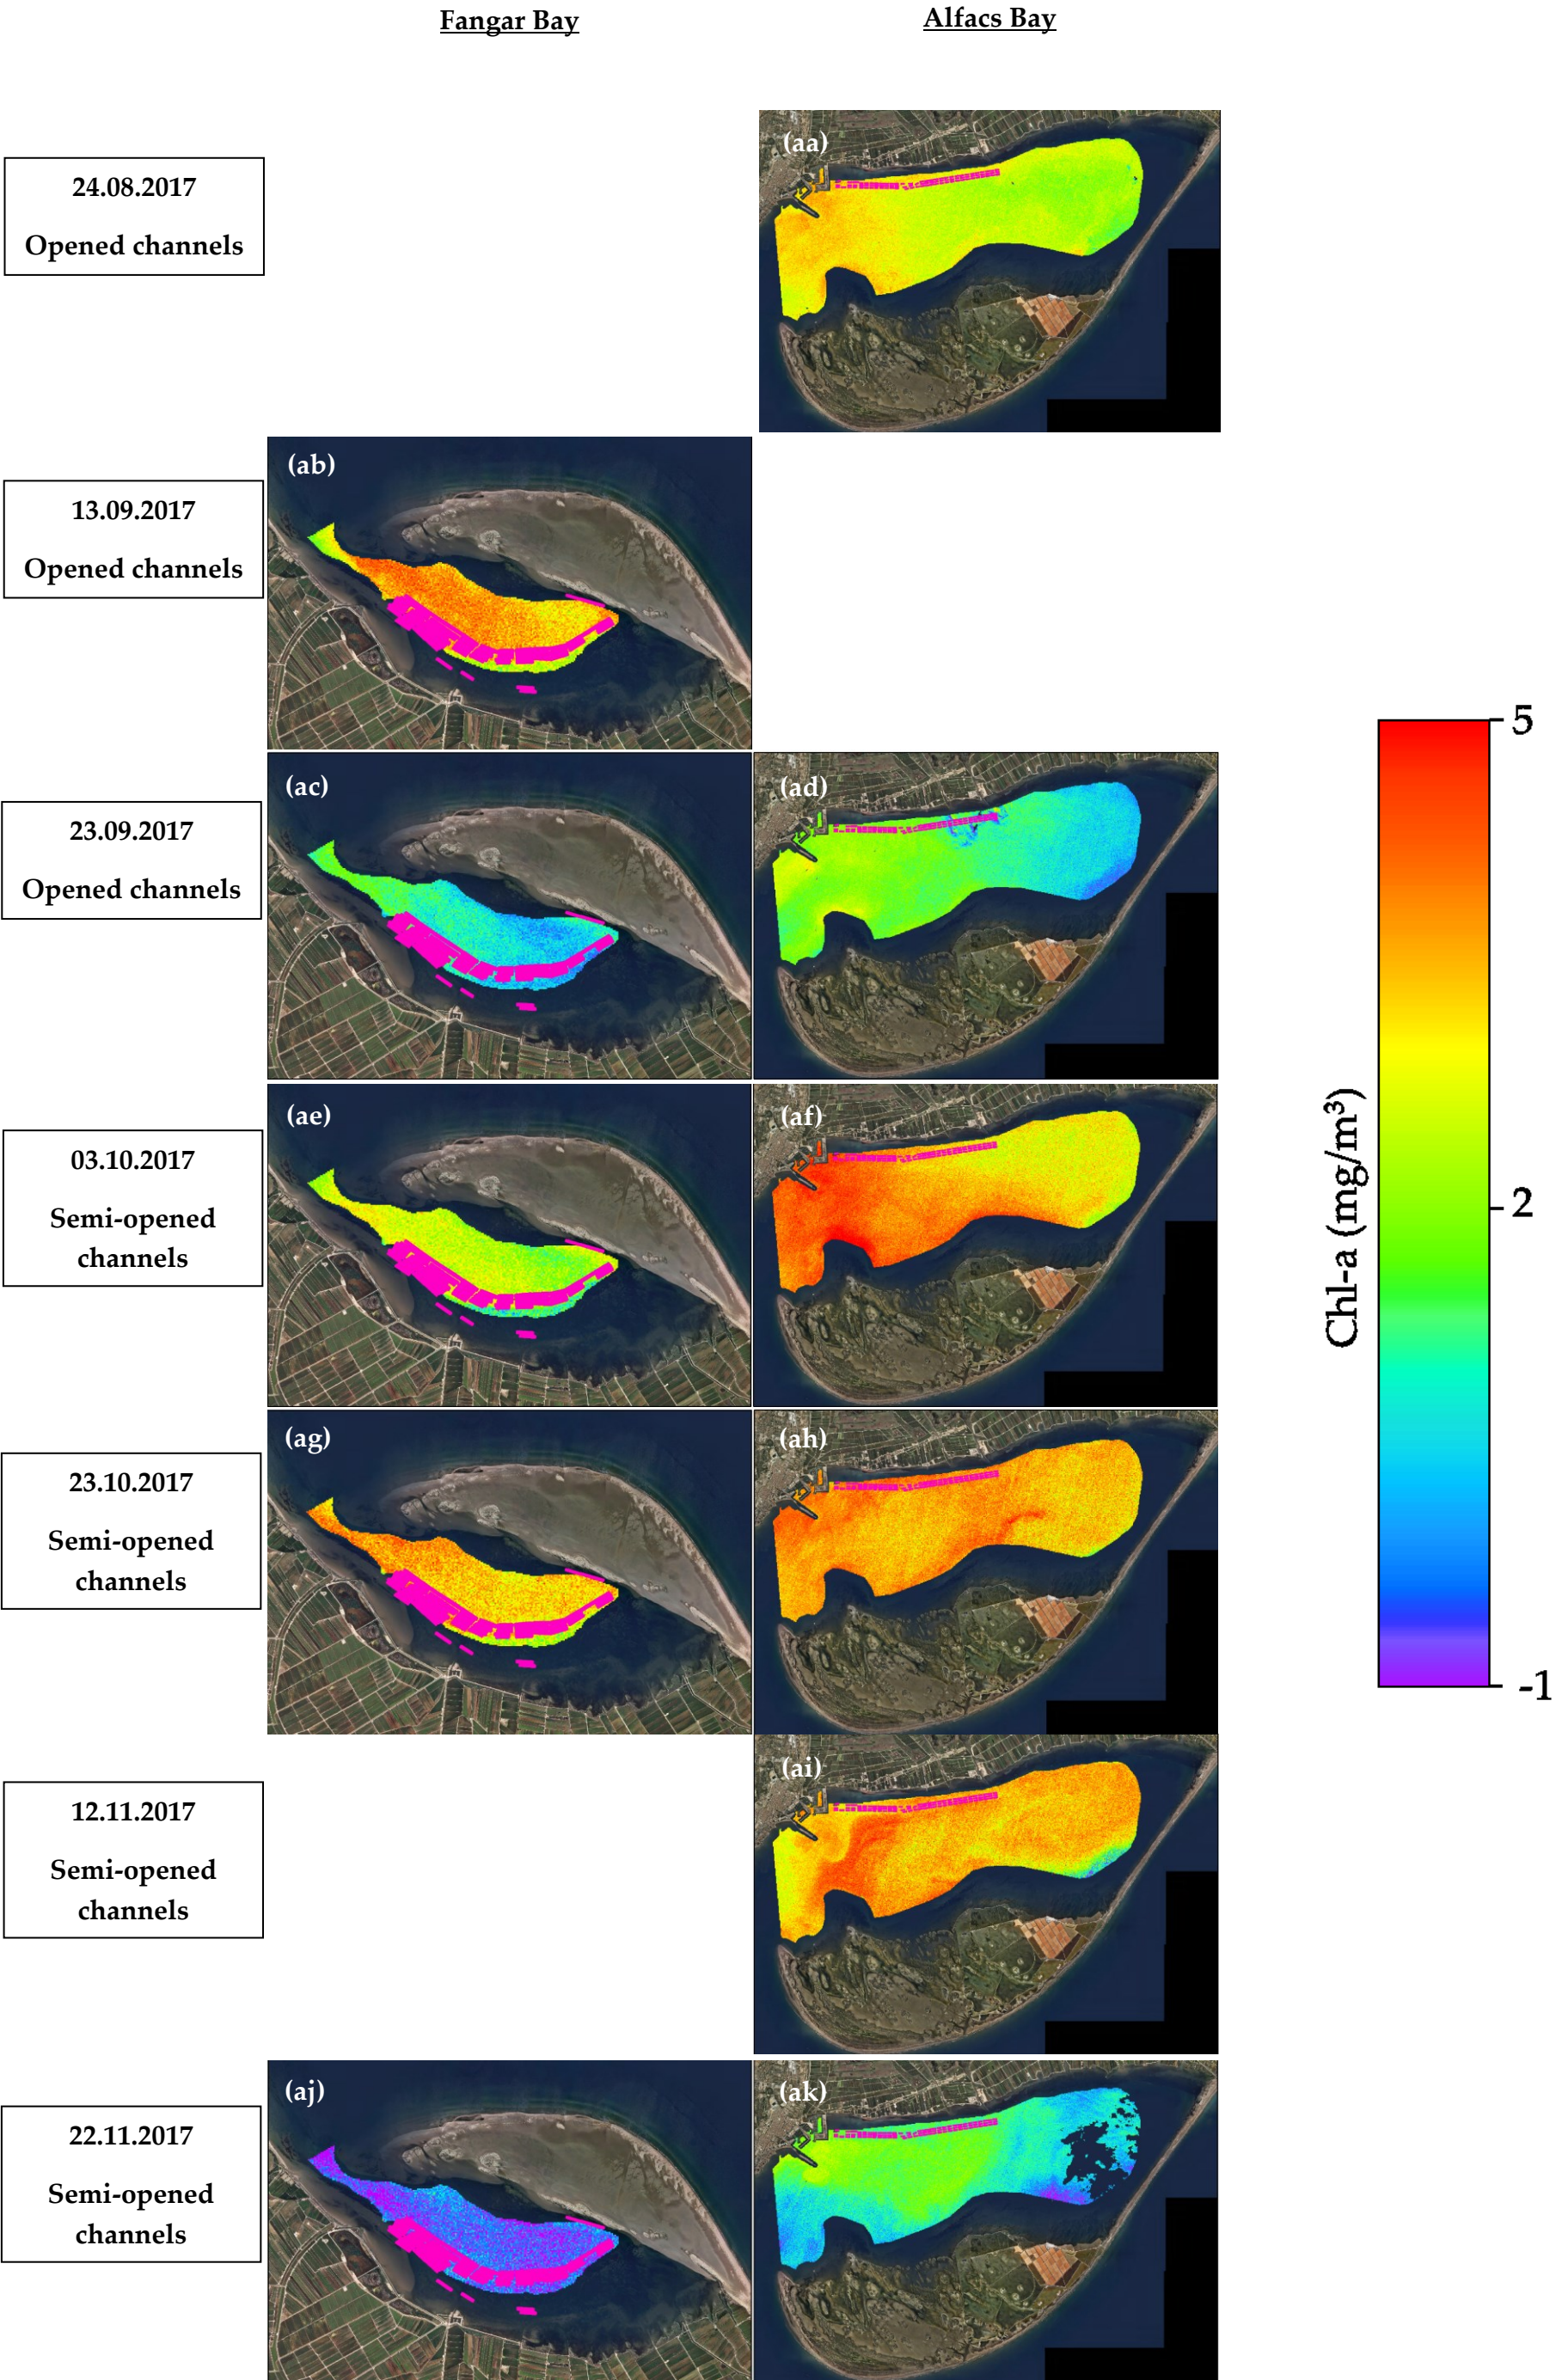



Figure S1. Chlorophyll-a time-series (year 2017)

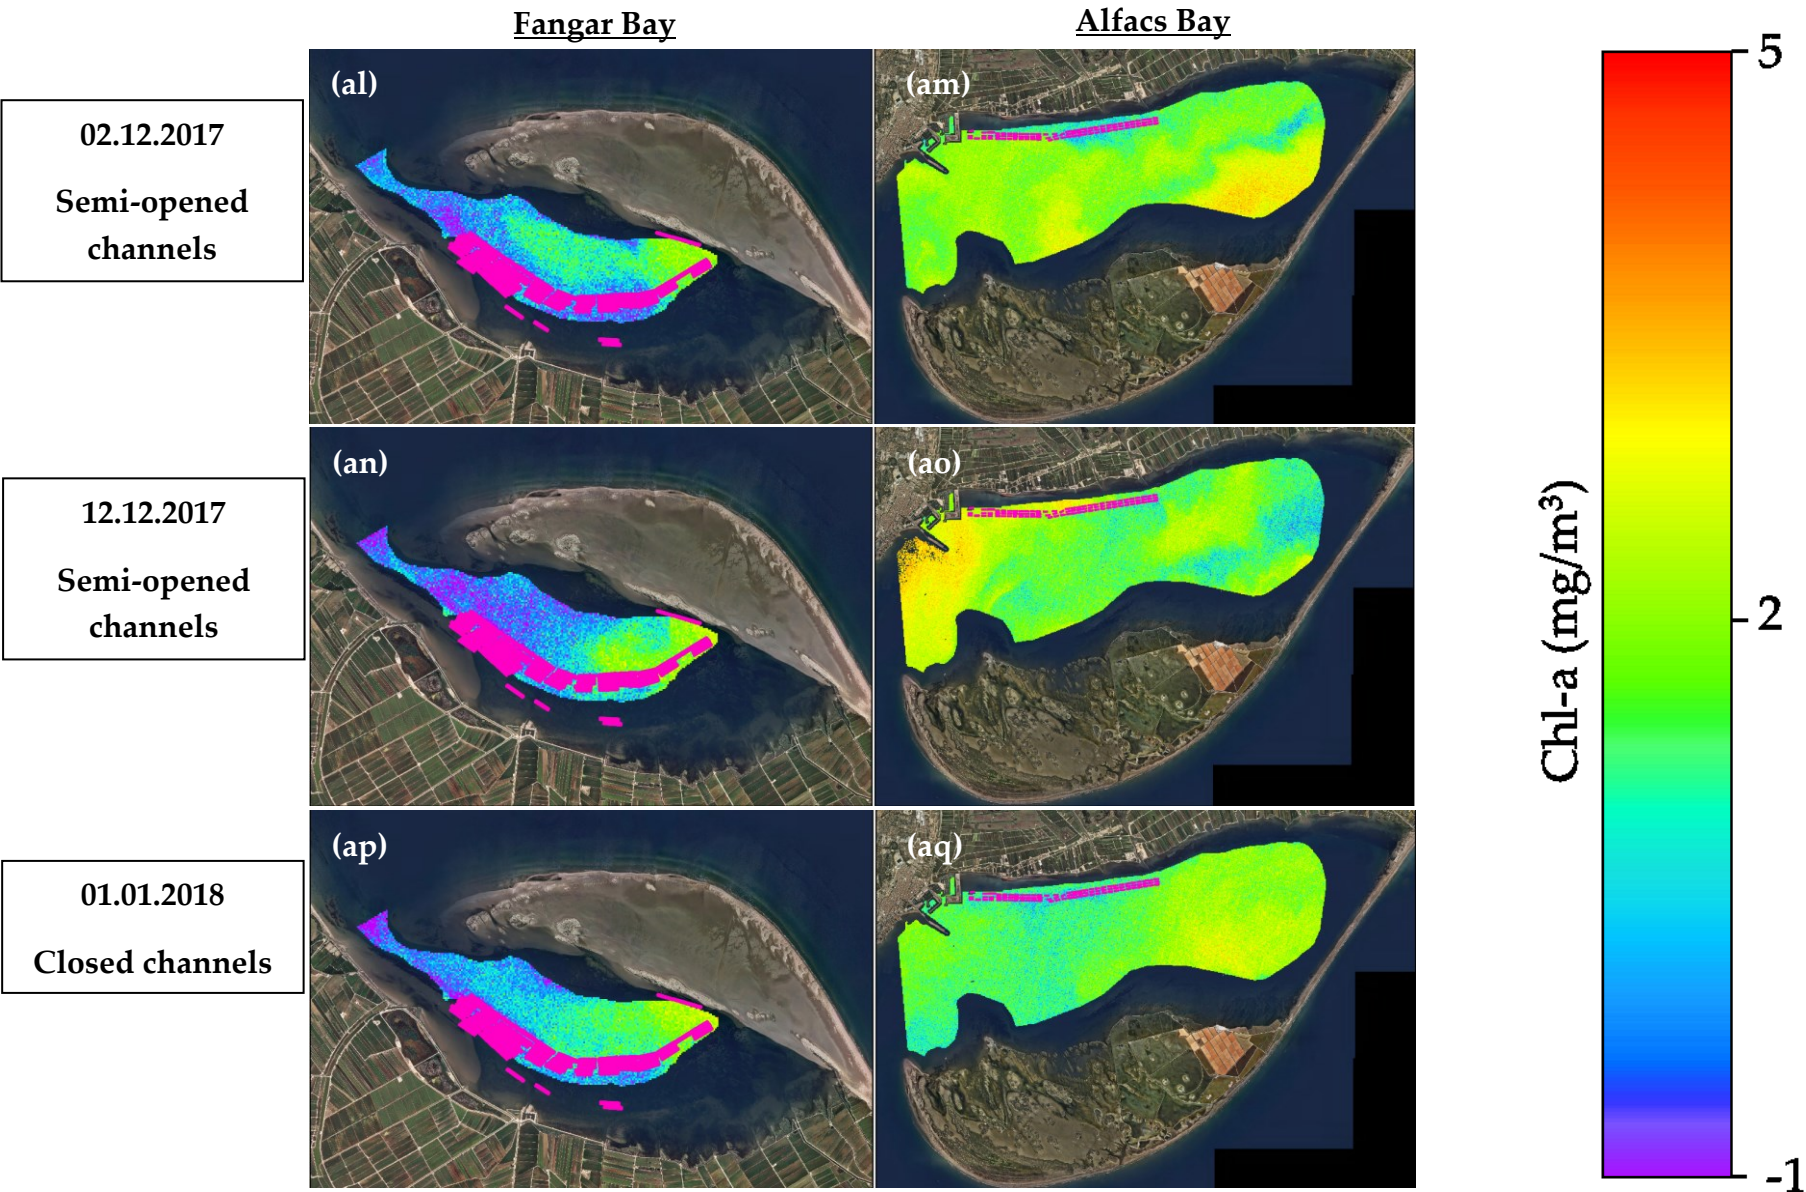

Supplement: s1 [file s1]
